# Supplementary material
Source: MDPI journal article supplement (https://www.mdpi.com/1424-2818/15/7/818)
Supplement: s1 [file s1]

Supplementary

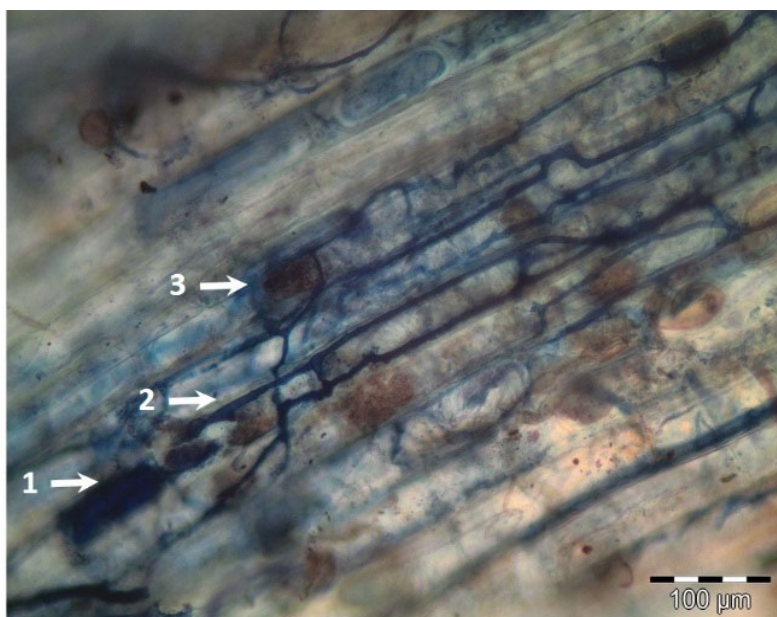

**Figure S1.** Mycorrhizal colonisation structures visualized by light microscopy (1: vesicle, 2: Intercellular hyphae, 3: arbuscule).

Transformation: Square root  
Resemblance: S17 Bray Curtis similarity

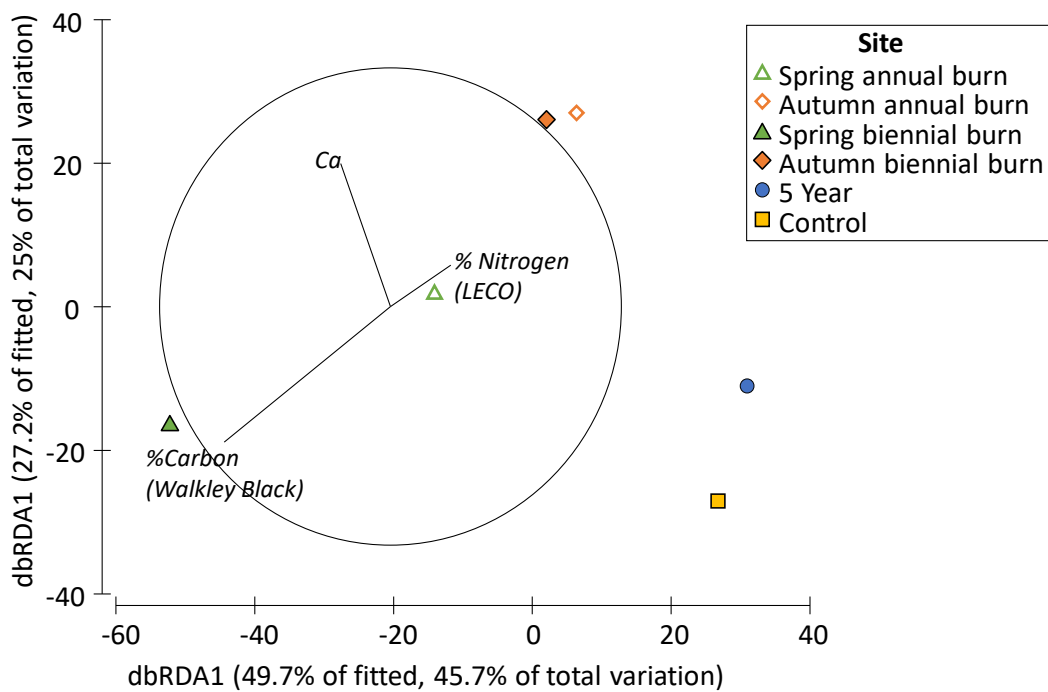

**Figure S2.** Distance-based RDA ordination of fungal data. Vectors indicate direction of the soil chemistry parameter effect in the ordination plot.

Supplementary Tables

Table S1. Diversity indices generated for bacteria and AM fungi on 454 and MiSeq platforms.

|                | Fire Regime | Total Number of Reads | Total Number of OTUs | OTU Richness (d) | Pielou's Evenness (J') | Shannon Index (H'(loge)) | Simpson Index (1-λ') |
|----------------|-------------|-----------------------|----------------------|------------------|------------------------|--------------------------|----------------------|
| Bacteria MiSeq | Control     | 8341                  | 2151.5               | 238.15           | 0.89485                | 6.867                    | 0.99715              |
|                | Five Year   | 8382                  | 2070.5               | 229.1            | 0.89115                | 6.8045                   | 0.99705              |
|                | Biennial    | 8365                  | 1983                 | 219.45           | 0.89145                | 6.7675                   | 0.99715              |
|                | Autumn      | 8123                  | 2155.5               | 239.35           | 0.8997                 | 6.9055                   | 0.99745              |
|                | Biennial    | 8123                  | 2155.5               | 239.35           | 0.8997                 | 6.9055                   | 0.99745              |
|                | Spring      | 8430                  | 2103.5               | 232.6            | 0.89045                | 6.813                    | 0.9971               |
|                | Annual      | 8430                  | 2103.5               | 232.6            | 0.89045                | 6.813                    | 0.9971               |
|                | Autumn      | 8475                  | 2077.5               | 229.6            | 0.88645                | 6.7715                   | 0.9967               |
| AM Fungi 454   | Control     | 1114                  | 82                   | 11.55            | 0.512                  | 2.256                    | 0.7649               |
|                | Five Year   | 1114                  | 85                   | 11.97            | 0.6691                 | 2.973                    | 0.9084               |
|                | Biennial    | 1114                  | 64                   | 8.98             | 0.5768                 | 2.399                    | 0.8184               |
|                | Autumn      | 1114                  | 64                   | 8.98             | 0.5768                 | 2.399                    | 0.8184               |
|                | Biennial    | 1114                  | 34                   | 4.704            | 0.1329                 | 0.4687                   | 0.1397               |
|                | Spring      | 1114                  | 34                   | 4.704            | 0.1329                 | 0.4687                   | 0.1397               |
|                | Annual      | 1114                  | 63                   | 8.837            | 0.5919                 | 2.452                    | 0.818                |
|                | Autumn      | 1114                  | 63                   | 8.837            | 0.5919                 | 2.452                    | 0.818                |
| Annual Spring  | 1114        | 65                    | 9.122                | 0.617            | 2.576                  | 0.8538                   |                      |

**Table S2.** Statistical analysis at phylum level for the soil bacterial community in burn-treated soils where statistical significance is indicated by  $p \leq 0.05$ .

| Phylum          | Burned Soils × Control |                 | Frequently Burned Soil Only |                 |
|-----------------|------------------------|-----------------|-----------------------------|-----------------|
|                 | F-Value                | <i>p</i> -Value | F-Value                     | <i>p</i> -Value |
| Acidobacteria   | 3.24                   | 0.091           | 2.89                        | 0.166           |
| Actinobacteria  | 7.48                   | 0.015*          | 10.97                       | 0.021*          |
| Bacteroidetes   | 7.23                   | 0.016*          | 7.22                        | 0.043*          |
| Chloroflexi     | 6.85                   | 0.018*          | 7.07                        | 0.045           |
| Planctomycetes  | 3.87                   | 0.65            | 7.76                        | 0.038*          |
| Proteobacteria  | 23.96                  | 0.001*          | 57.64                       | 0.001*          |
| Verrucomicrobia | 2.65                   | 0.133           | 5.59                        | 0.065           |

**Table S3.** BLAST analysis of select dominant fungal OTUs against the NCBI nucleotide database from which the uncultured/environmental sequences were omitted.

| OTU | Closest BLAST Match              | Family                  | Accession Number | Identity (%) |
|-----|----------------------------------|-------------------------|------------------|--------------|
| 1   | <i>Glomus</i> sp. VTX00096       | <i>Glomeraceae</i>      | LN615455         | 98.5         |
| 2   | <i>Glomus</i> sp. VTX00089       | <i>Glomeraceae</i>      | HE799208         | 98.9         |
| 3   | <i>Glomus</i> sp. VTX00420       | <i>Glomeraceae</i>      | LN619015         | 99.6         |
| 4   | <i>Archaeospora</i> sp. VTX00005 | <i>Archaeosporaceae</i> | LN621099         | 98.5         |
| 5   | <i>Glomus</i> sp. VTX00420       | <i>Glomeraceae</i>      | LN619015         | 100          |
| 6   | <i>Glomus</i> sp. VTX00360       | <i>Glomeraceae</i>      | LN619084         | 98.9         |
| 7   | <i>Glomus</i> Glo2 VTX00096      | <i>Glomeraceae</i>      | AY129604         | 99.3         |
| 8   | <i>Glomus</i> sp. VTX00414       | <i>Glomeraceae</i>      | LN616714         | 100          |
| 9   | <i>Glomus</i> sp. VTX00315       | <i>Glomeraceae</i>      | LN623303         | 100          |

**Table S4.** Marginal and sequential tests from distance-based redundancy analysis of the bacterial community.

| MARGINAL TESTS             |                |            |          |          |          |         |        |
|----------------------------|----------------|------------|----------|----------|----------|---------|--------|
| Variable                   | SS (trace)     | Pseudo-F   | <i>p</i> | Prop.    |          |         |        |
| ***Ca (mg/kg)              | 4517.1         | 3.6151     | 0.001    | 0.26552  |          |         |        |
| ***Mg(mg/kg)               | 4223.9         | 3.303      | 0.001    | 0.24829  |          |         |        |
| *pH (H2O)                  | 2875.3         | 2.0339     | 0.025    | 0.16902  |          |         |        |
| Time since last fire       | 2469.1         | 1.6978     | 0.056    | 0.14514  |          |         |        |
| %Nitrogen (LECO)           | 2121.1         | 1.4244     | 0.091    | 0.12468  |          |         |        |
| pH (KCl)                   | 2109.2         | 1.4153     | 0.106    | 0.12398  |          |         |        |
| Na (mg/kg)                 | 2149.3         | 1.4461     | 0.107    | 0.12634  |          |         |        |
| %Carbon (Walkley Black)    | 1798.4         | 1.1821     | 0.211    | 0.10571  |          |         |        |
| K (mg/kg)                  | 1678.6         | 1.0947     | 0.27     | 9.87E-02 |          |         |        |
| Fire treatment             | 1517.5         | 0.97934    | 0.405    | 8.92E-02 |          |         |        |
| EC (mS/m)                  | 1344.7         | 0.85828    | 0.569    | 7.90E-02 |          |         |        |
| SEQUENTIAL TESTS           |                |            |          |          |          |         |        |
| Variable                   | R <sup>2</sup> | SS (Trace) | Pseudo-F | <i>p</i> | Prop.    | Cumul.  | res.df |
| ***+Ca (mg/kg)             | 0.26552        | 4517.1     | 3.6151   | 0.001    | 0.26552  | 0.26552 | 10     |
| **+%Carbon (Walkley Black) | 0.37411        | 1847.3     | 1.5614   | 0.003    | 0.10859  | 0.37411 | 9      |
| +Time since last fire      | 0.46723        | 1584.2     | 1.3983   | 0.055    | 9.31E-02 | 0.46723 | 8      |
| +pH (H2O)                  | 0.54534        | 1328.7     | 1.2025   | 0.277    | 7.81E-02 | 0.54534 | 7      |
| +Mg(mg/kg)                 | 0.62016        | 1272.9     | 1.1819   | 0.375    | 7.48E-02 | 0.62016 | 6      |

Statistical significance: \*  $p = 0.05$ , \*\*  $p = 0.01$ , and \*\*\*  $p = 0.001$ .

**Table S5.** Marginal and sequential tests from distance-based redundancy analysis of the fungal community.

| <b>MARGINAL TESTS</b>    |                      |                   |                 |                 |              |               |               |
|--------------------------|----------------------|-------------------|-----------------|-----------------|--------------|---------------|---------------|
| <b>Variable</b>          | <b>SS (trace)</b>    | <b>Pseudo-F</b>   | <b><i>p</i></b> | <b>Prop.</b>    |              |               |               |
| pH (KCl)                 | 3143.8               | 1.7891            | 0.094           | 0.30905         |              |               |               |
| pH (H2O)                 | 3037.9               | 1.7032            | 0.117           | 0.29864         |              |               |               |
| Time since last fire     | 3235.1               | 1.8654            | 0.177           | 0.31803         |              |               |               |
| K (mg/kg)                | 2527.9               | 1.3227            | 0.279           | 0.2485          |              |               |               |
| %Carbon (Walkley Black)  | 2509.6               | 1.31              | 2.81E-01        | 0.24671         |              |               |               |
| Ca (mg/kg)               | 2150.2               | 1.0721            | 0.398           | 0.21138         |              |               |               |
| Na (mg/kg)               | 1831.9               | 0.87853           | 0.506           | 0.18008         |              |               |               |
| Fire treatment           | 1615.9               | 0.75539           | 0.545           | 0.15885         |              |               |               |
| Mg(mg/kg)                | 1830.7               | 0.87787           | 0.551           | 0.17997         |              |               |               |
| %Nitrogen (LECO)         | 1318.3               | 5.96E-01          | 0.762           | 0.1296          |              |               |               |
| EC (mS/m)                | 1.03E+03             | 0.45138           | 0.872           | 0.1014          |              |               |               |
| <b>SEQUENTIAL TESTS</b>  |                      |                   |                 |                 |              |               |               |
| <b>Variable</b>          | <b>R<sup>2</sup></b> | <b>SS (trace)</b> | <b>Pseudo-F</b> | <b><i>p</i></b> | <b>Prop.</b> | <b>Cumul.</b> | <b>res.df</b> |
| +%Nitrogen (LECO)        | 0.81357              | 2788.2            | 2.9404          | 0.077           | 0.2741       | 0.81357       | 2             |
| +Time since last fire    | 0.31803              | 3235.1            | 1.8654          | 0.173           | 0.31803      | 0.31803       | 4             |
| +%Carbon (Walkley Black) | 0.53947              | 2252.6            | 1.4425          | 0.231           | 0.22144      | 0.53947       | 3             |
| +Ca (mg/kg)              | 0.91998              | 1082.5            | 1.3299          | 0.373           | 0.10641      | 0.91998       | 1             |

Statistical significance: \*  $p = 0.05$ , \*\*  $p = 0.01$ , and \*\*\*  $p = 0.001$ .
